# Supplementary material for: Highly efficient and reversible CO2 capture through 1,1,3,3-tetramethylguanidinium imidazole ionic liquid
Source: Royal Society of Chemistry journal article supplement (doi:10.1039/c3ra47524g), 2014-01-01
Supplement: c3ra47524g.pdf [file c3ra47524g.pdf]

# Highly efficient and reversible CO<sub>2</sub> capture through 1,1,3,3-tetramethylguanidinium imidazole ionic liquid

Xingxing Lei, Yingjie Xu,\* Lili Zhu and Xuhong Wang

*Department of Chemistry, Shaoxing University, Shaoxing, Zhejiang 312000, China*

Fax: +86 575 88341521; Tel: +86 575 88342708; E-mail: [xuyj@usx.edu.cn](mailto:xuyj@usx.edu.cn)

## Supplementary information

<sup>1</sup>H NMR and <sup>13</sup>C NMR data of [P<sub>66614</sub>][IM]

CO<sub>2</sub>-free [P<sub>66614</sub>][IM]: <sup>1</sup>H NMR (400 MHz; CDCl<sub>3</sub>; TMS): 0.89 (m, 12H, CH<sub>3</sub>), 1.31-1.48 (m, 48H, CH<sub>2</sub>), 2.37 (m, 8H, PCH<sub>2</sub>), 7.03 (s, 2H, C<sub>4</sub>H and C<sub>5</sub>H of imidazole anion), 7.64 ppm (s, 1H, C<sub>2</sub>H of imidazole anion); <sup>13</sup>C NMR (400 MHz; CDCl<sub>3</sub>; TMS): 13.9, 14.1, 21.7, 22.3, 22.7, 29.0, 29.3, 29.4, 29.6, 30.4, 30.5, 30.7, 30.8, 31.1, 31.9, 121.7, 135.3 ppm.

CO<sub>2</sub>-absorbed [P<sub>66614</sub>][IM]: <sup>13</sup>C NMR (400 MHz; CDCl<sub>3</sub>; TMS): 14.1, 15.6, 18.5, 19.0, 21.7, 22.3, 29.3, 29.4, 30.4, 30.5, 31.0, 31.9, 122.0, 135.7, 160.3 ppm.

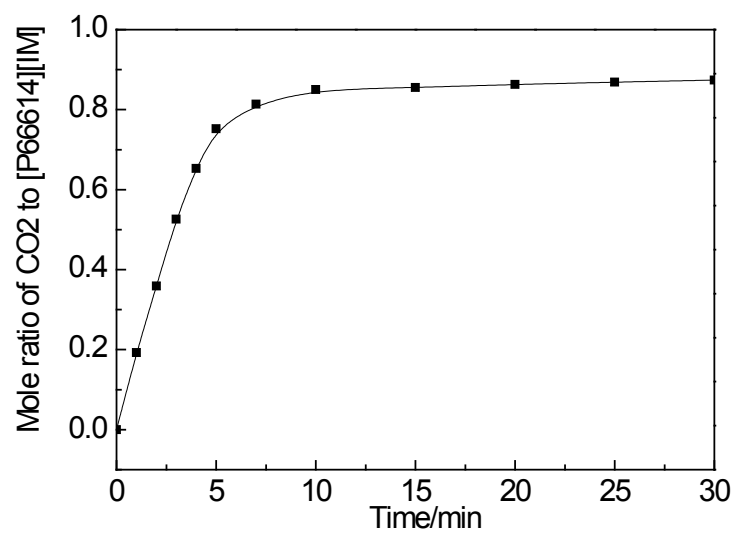

Fig. S1. CO<sub>2</sub> absorption of [P<sub>66614</sub>][IM] at 30°C under atmospheric pressure

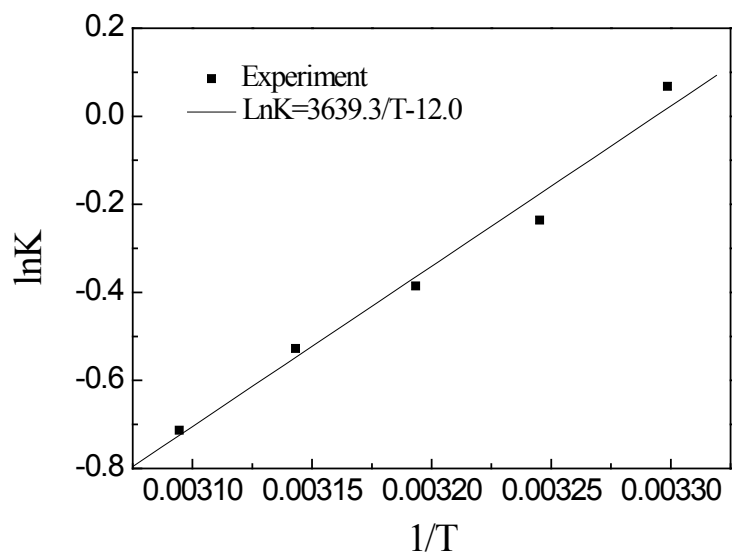

Fig. S2. Variation in the natural logarithm equilibrium constant of [TMG][IM] with temperature.

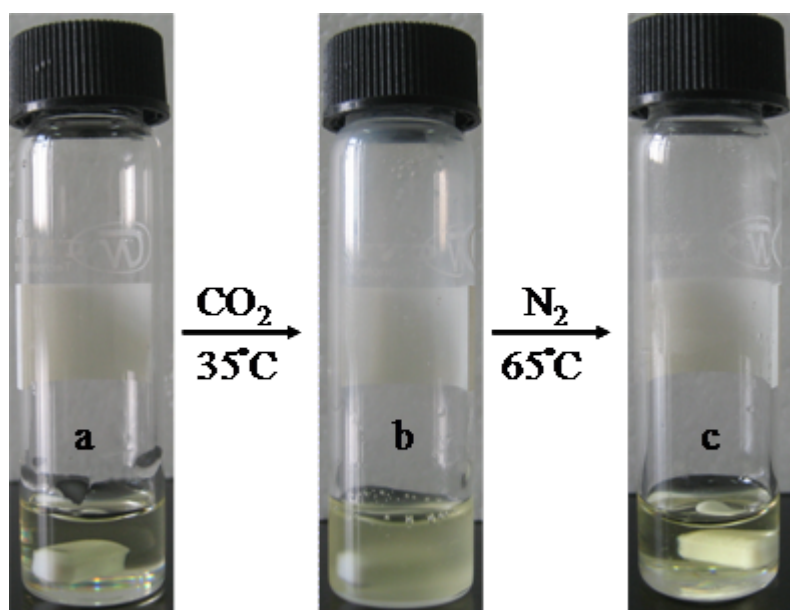

Fig. S3. Appearance of [TMG][IM] before and after  $\text{CO}_2$  absorption at  $35^\circ\text{C}$ , and stripped at  $65^\circ\text{C}$  under  $\text{N}_2$ .
